# Supplementary material for: Thermo-analytical determination of intermediates in the copper catalysed rearrangement of o-toluic acid to meta-cresol
Source: Royal Society of Chemistry journal article supplement (doi:10.1039/c3cy00119a), 2013-01-01
Supplement: c3cy00119a.pdf [file c3cy00119a.pdf]

## Thermo-analytical determination of intermediates in the copper catalysed rearrangement of *o*-toluic acid to *meta*-cresol

Abraham C. Sunil, Ernst H.G. Langner, Charlene Marais, and Barend C.B. Bezuidenhoudt<sup>a\*</sup>

<sup>1</sup>H NMR of tetrakis(μ<sub>2</sub>-2-methylbenzoato)bis(2-methylbenzoic acid)copper(II) **5**

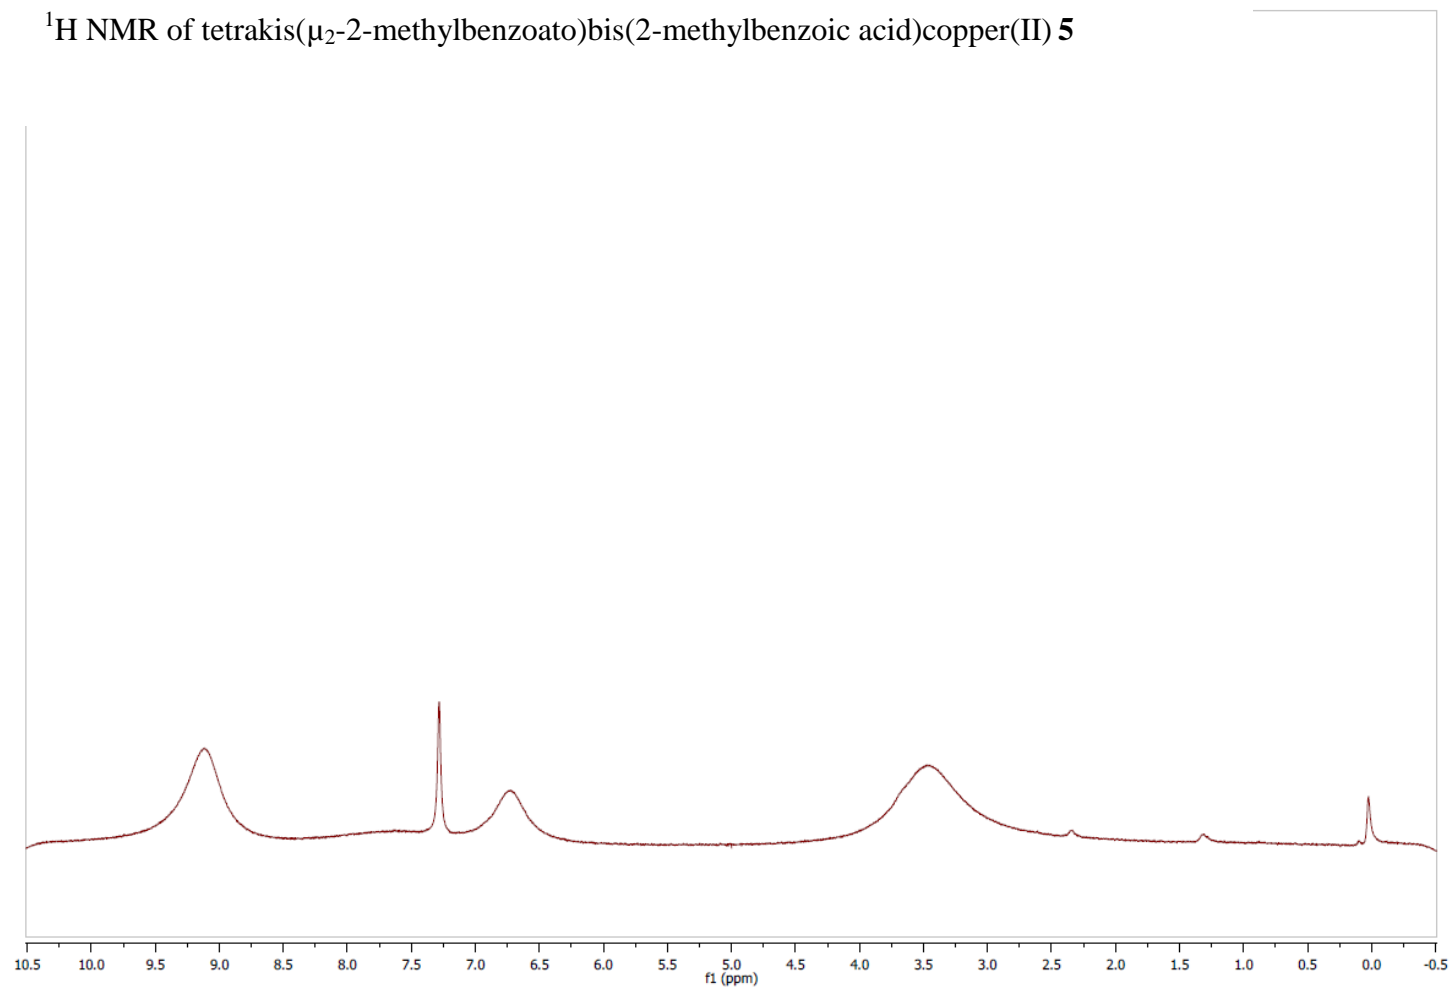

$^1\text{H}$  NMR of tetrakis( $\mu_2$ -2-methylbenzoato)bis(2-methylbenzoic acid)copper(II) **5**

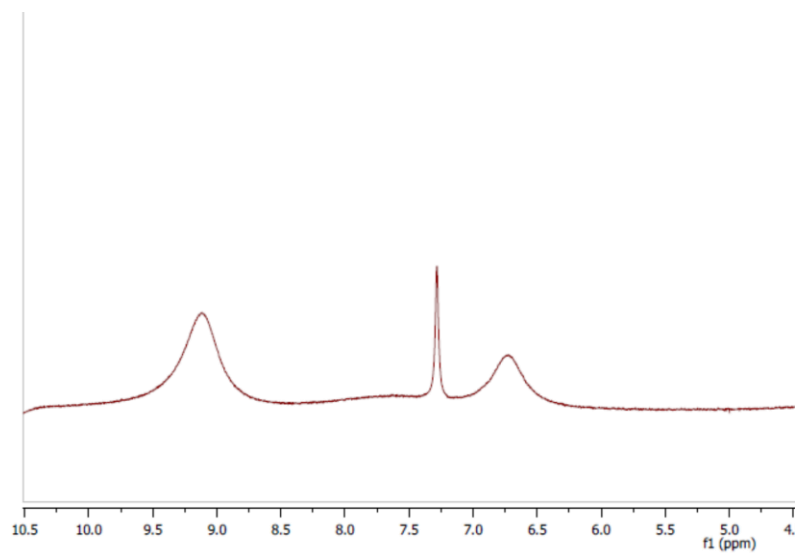

$^1\text{H}$  NMR of DSC product tetrakis( $\mu_2$ -2-methylbenzoato) copper(II) **6**

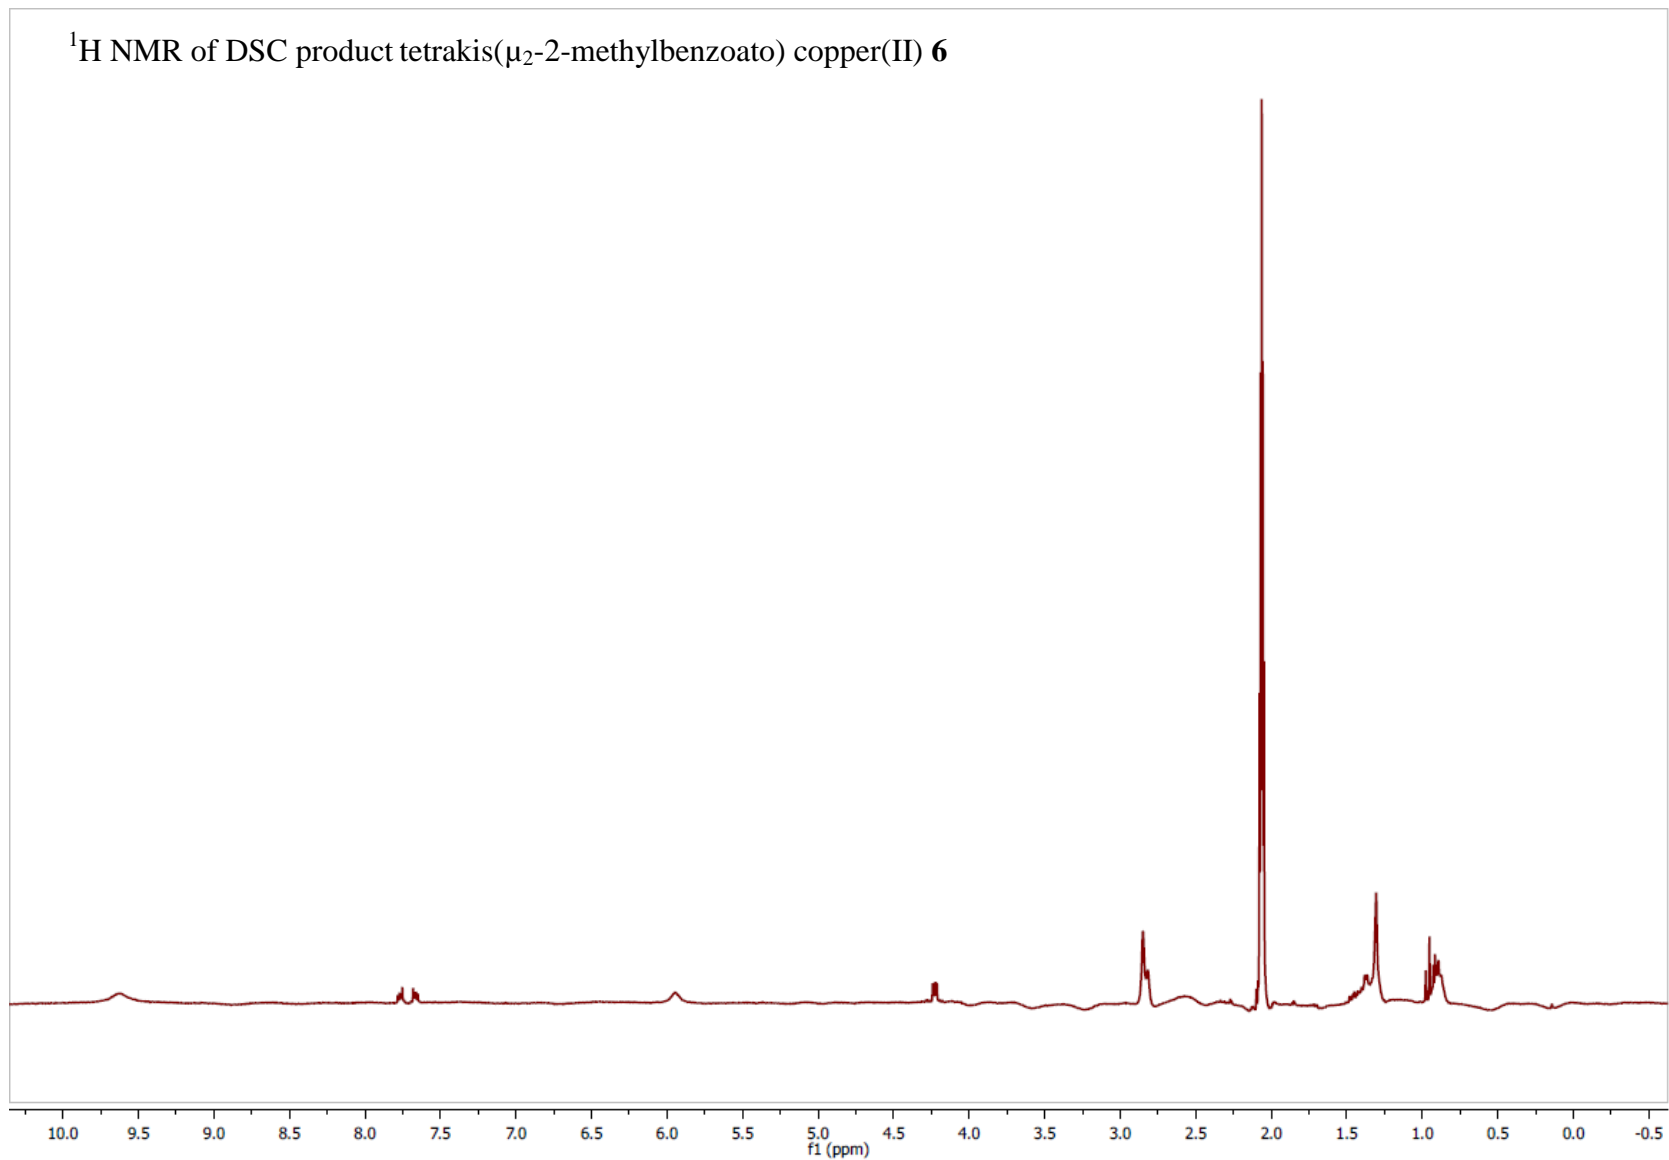

$^1\text{H}$  NMR of DSC product tetrakis( $\mu_2$ -2-methylbenzoato) copper(II) **6**

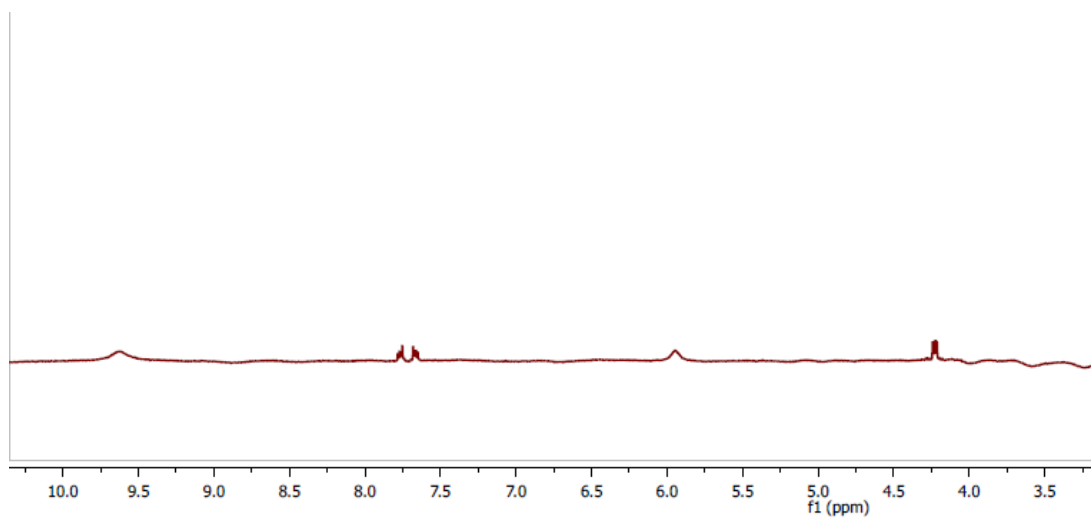

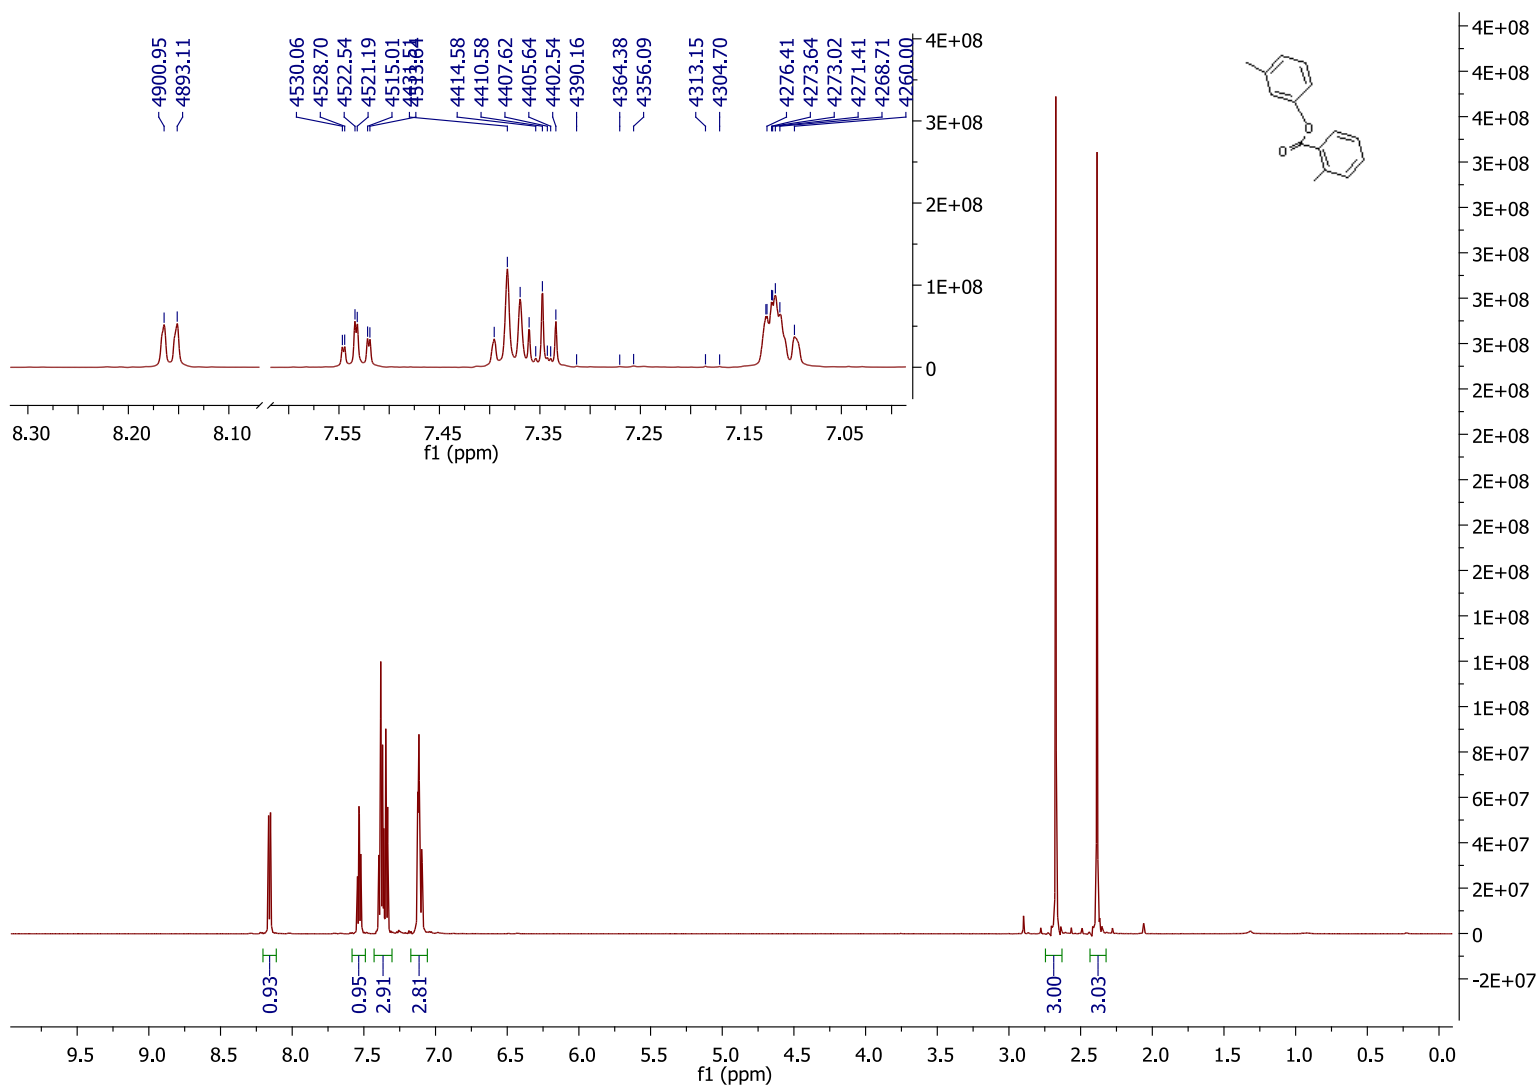

$^1\text{H}$  NMR of 3-methylphenyl 2-methylbenzoate **4**

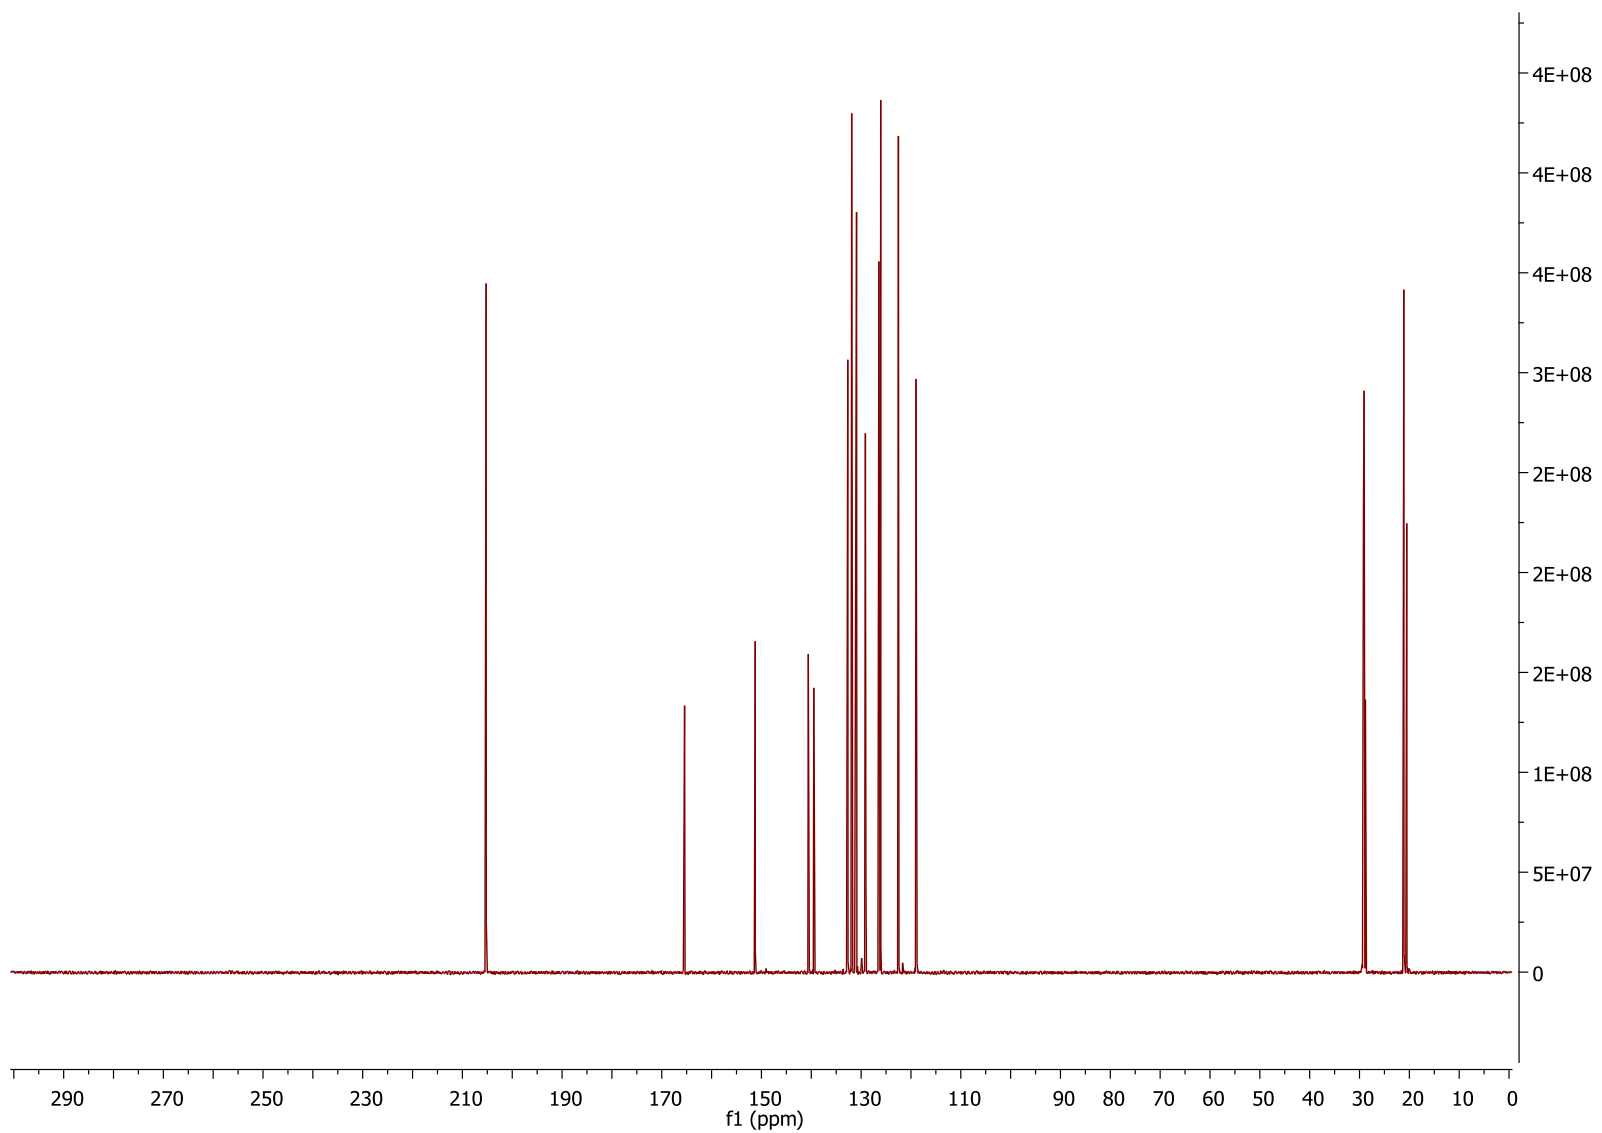

$^{13}\text{C}$  NMR of 3-methylphenyl 2-methylbenzoate **4**

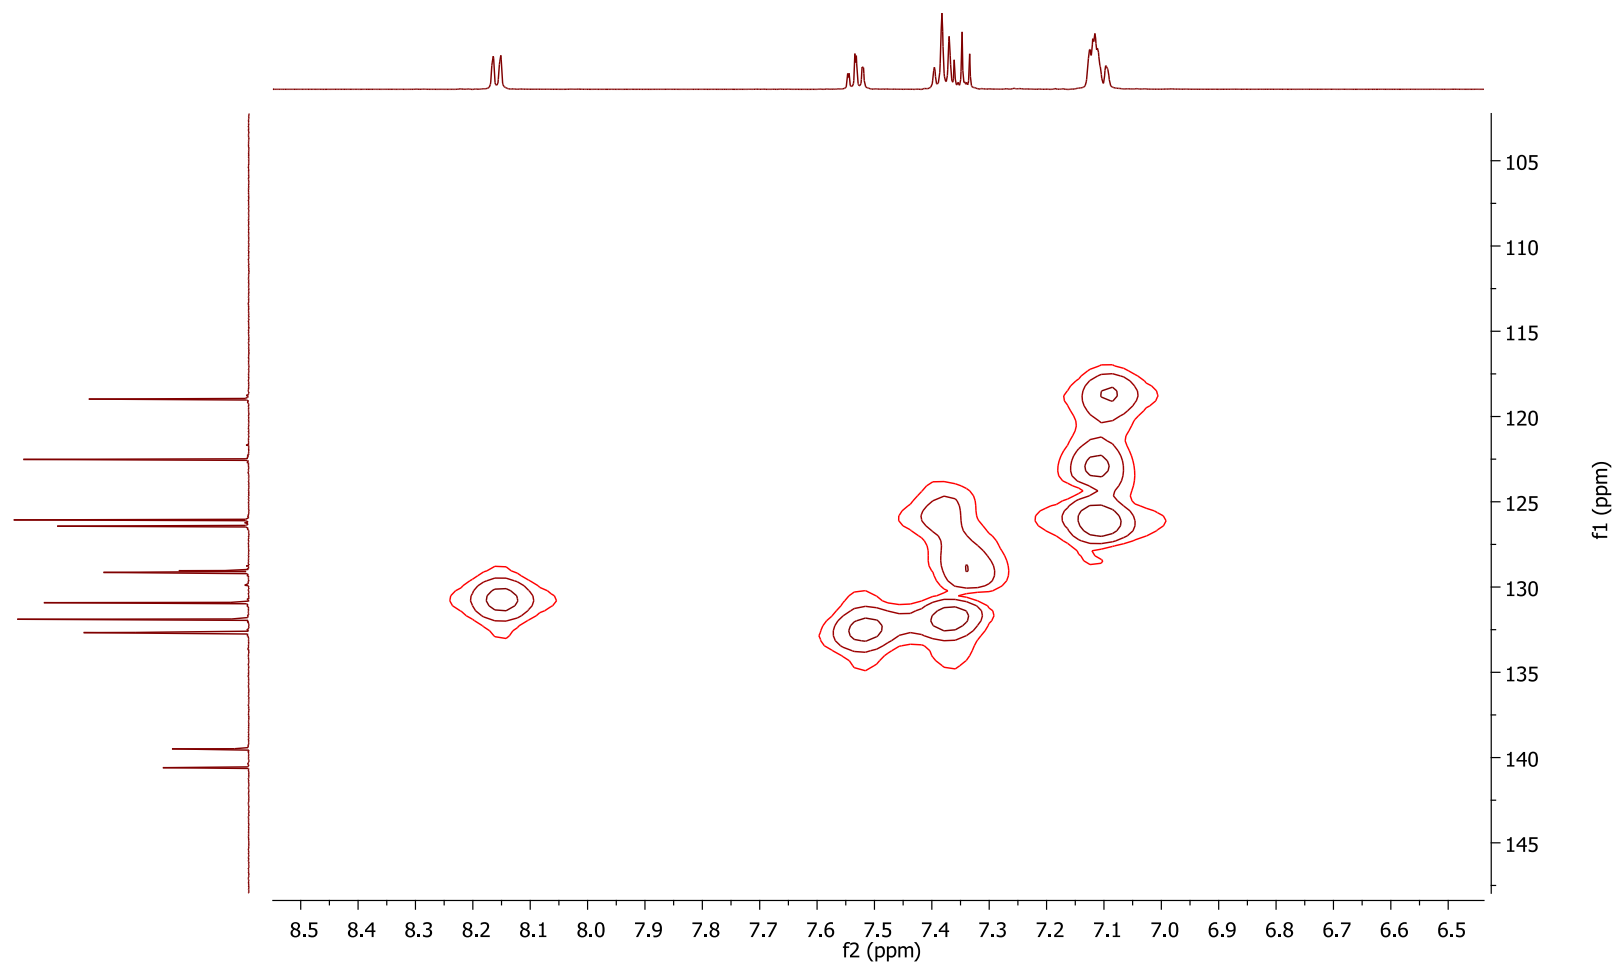

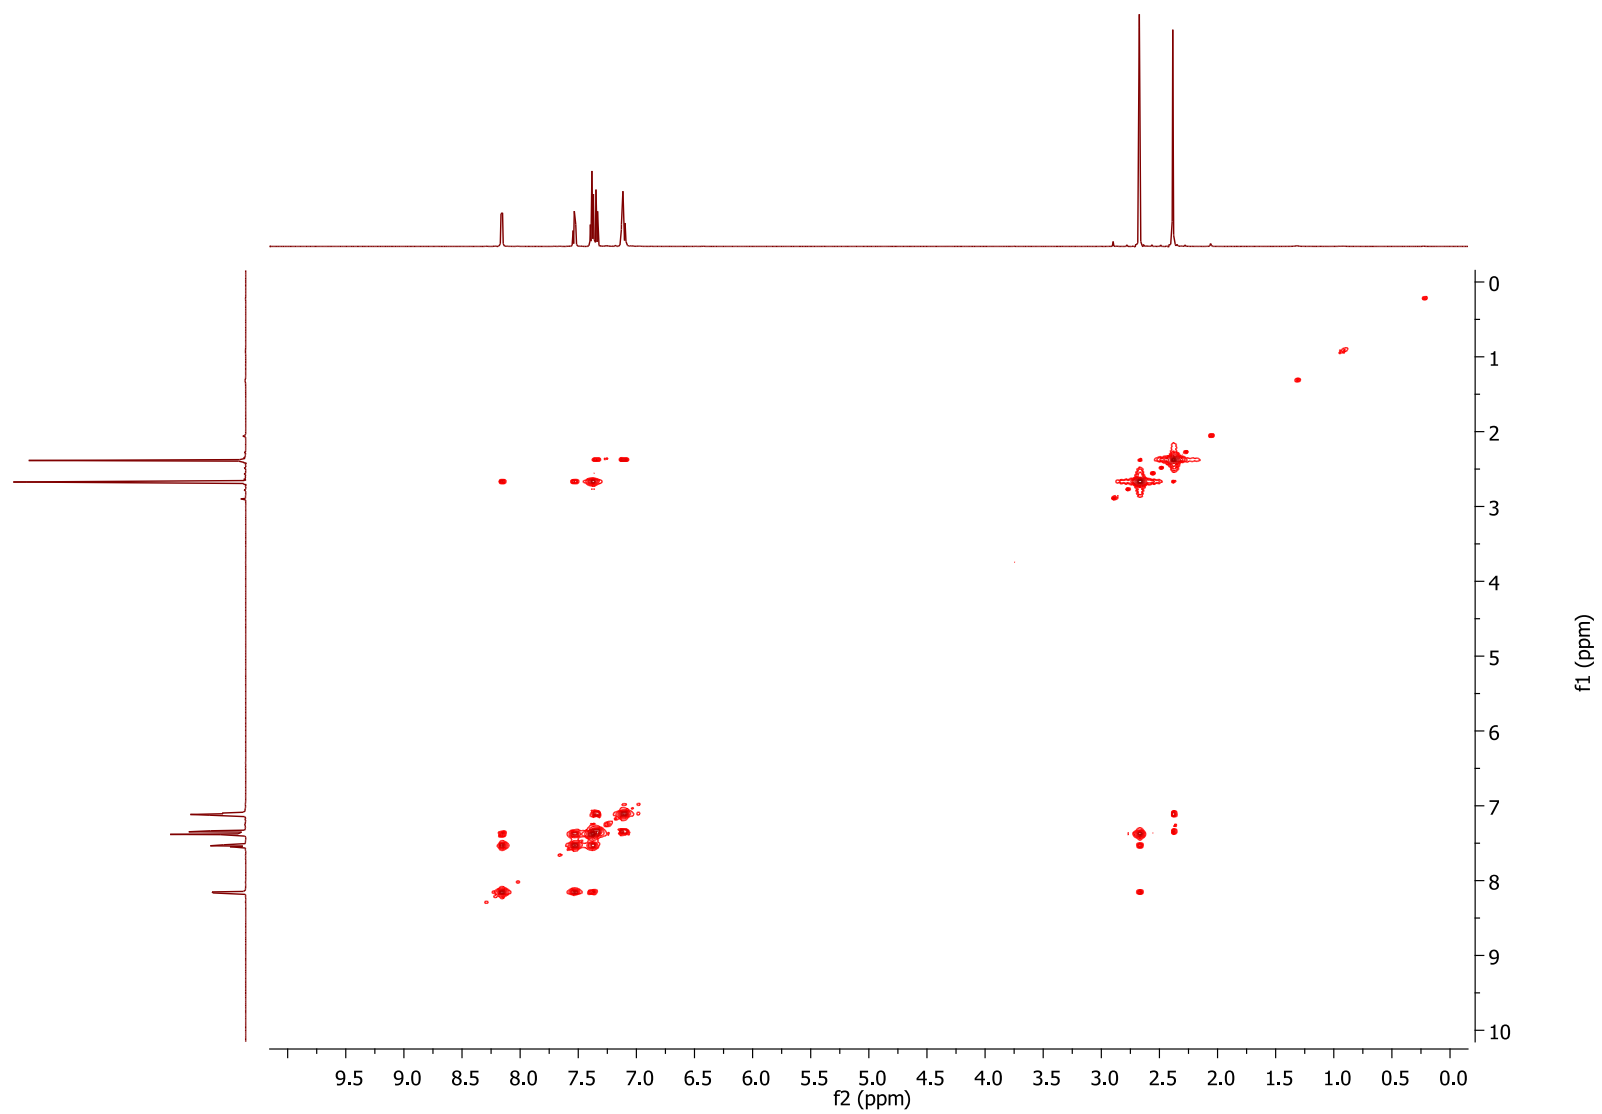

HMBC of 3-methylphenyl 2-methylbenzoate **4**



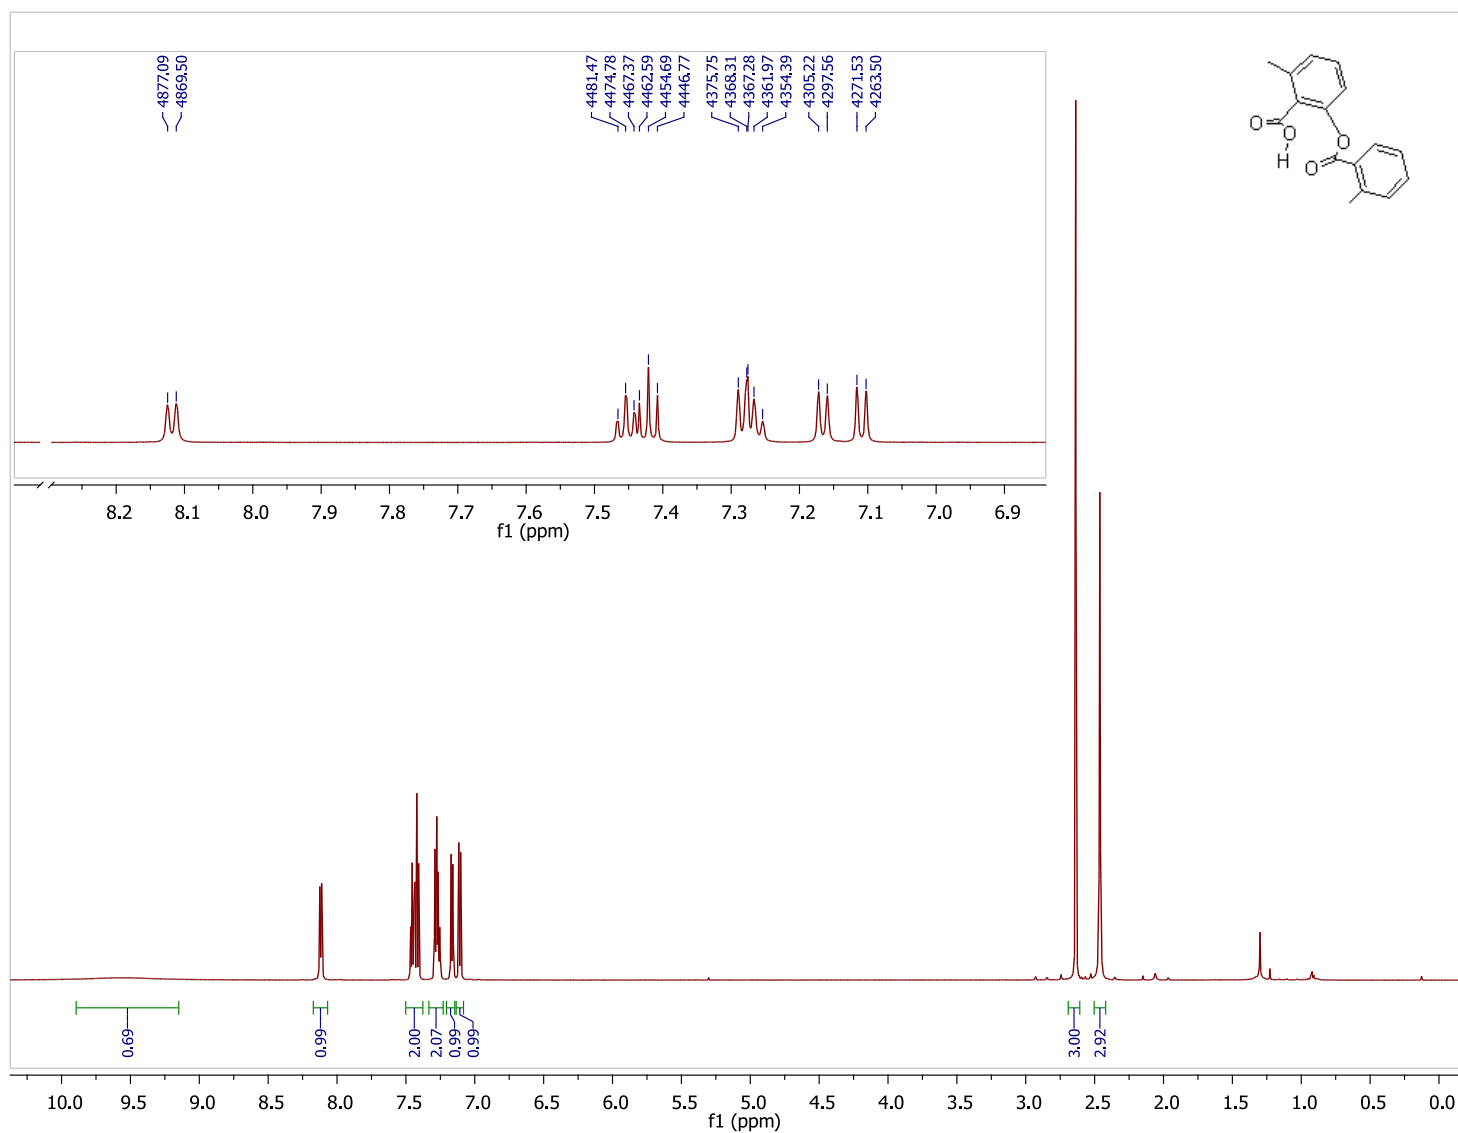

<sup>1</sup>H NMR of 2-methyl-6-[[2-methylphenyl]carbonyloxy]benzoic acid **3**

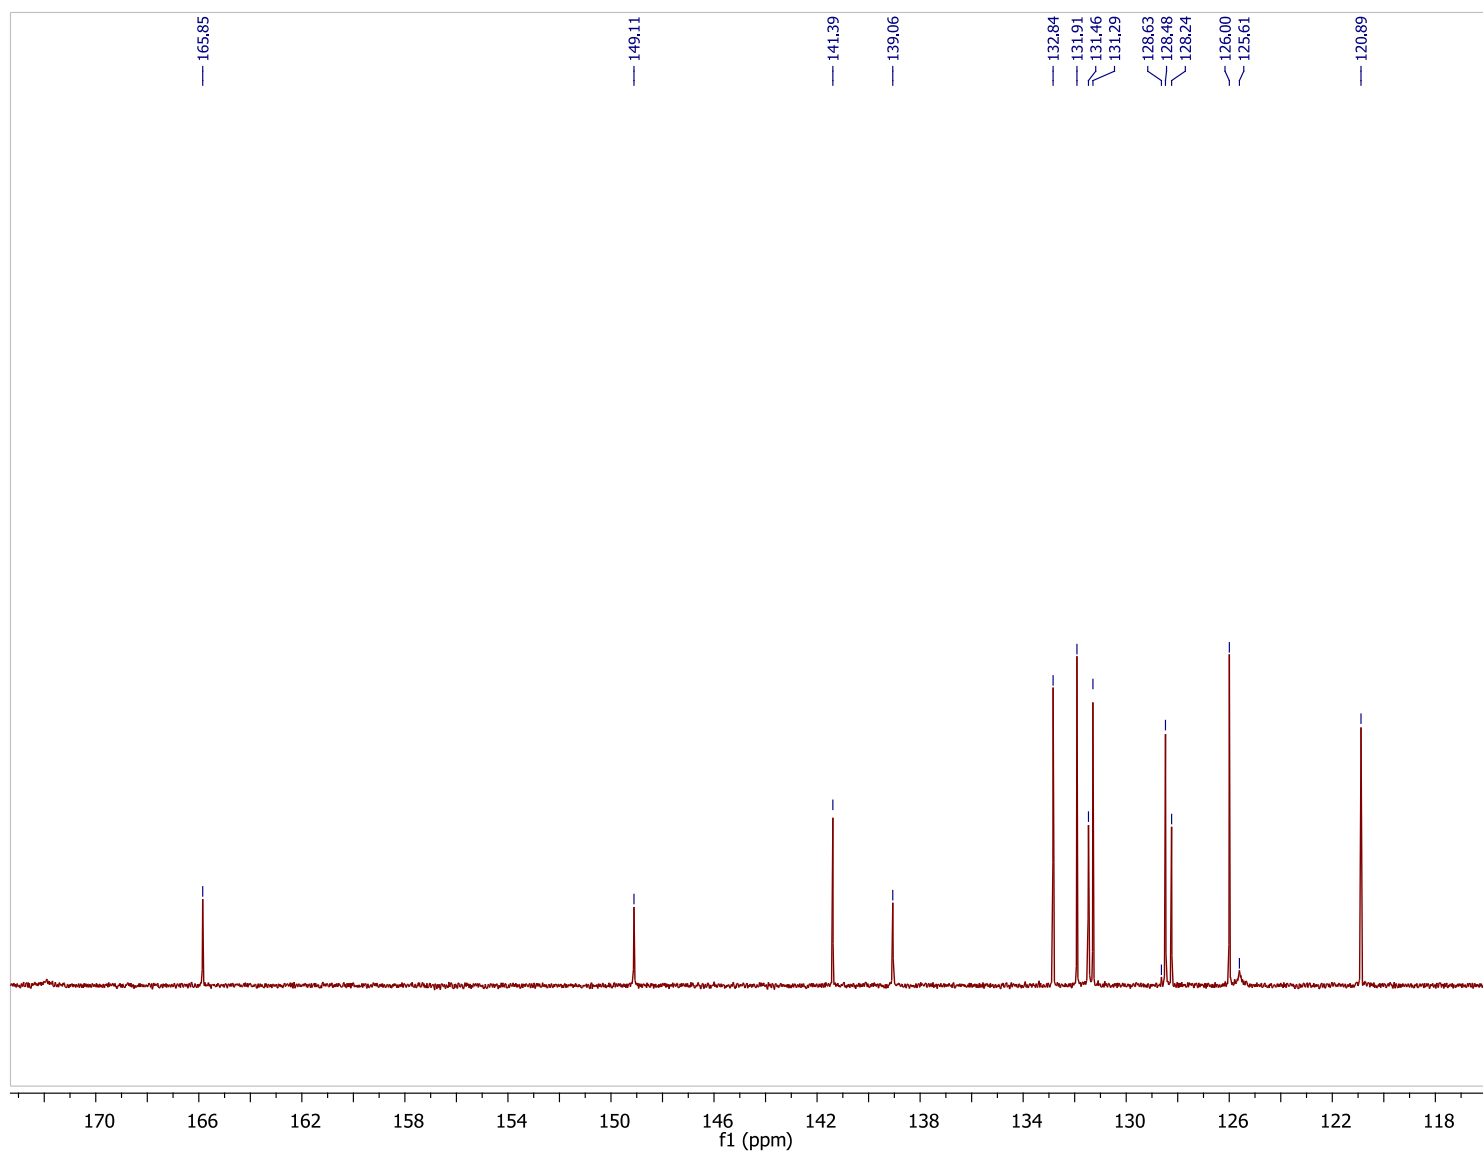

<sup>13</sup>C NMR of 2-methyl-6-[[2-methylphenyl]carbonyl]oxy}benzoic acid **3**

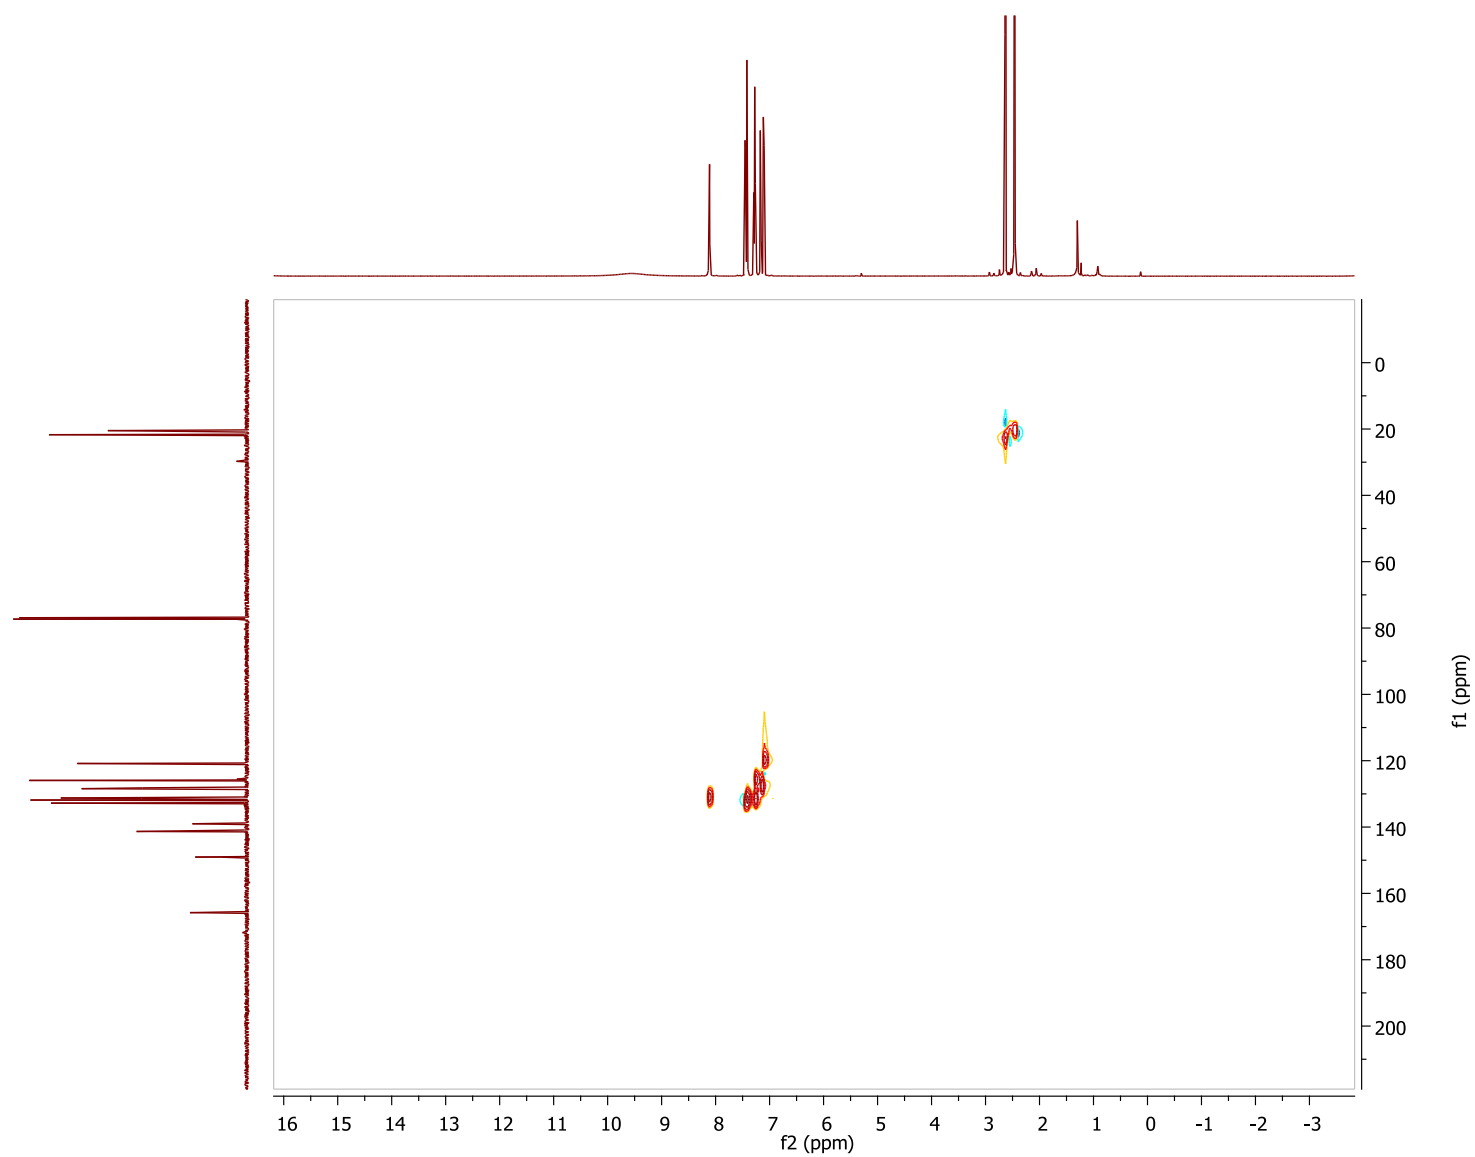

HSQC of 2-methyl-6-[(2-methylphenyl)carbonyl]oxybenzoic acid **3**

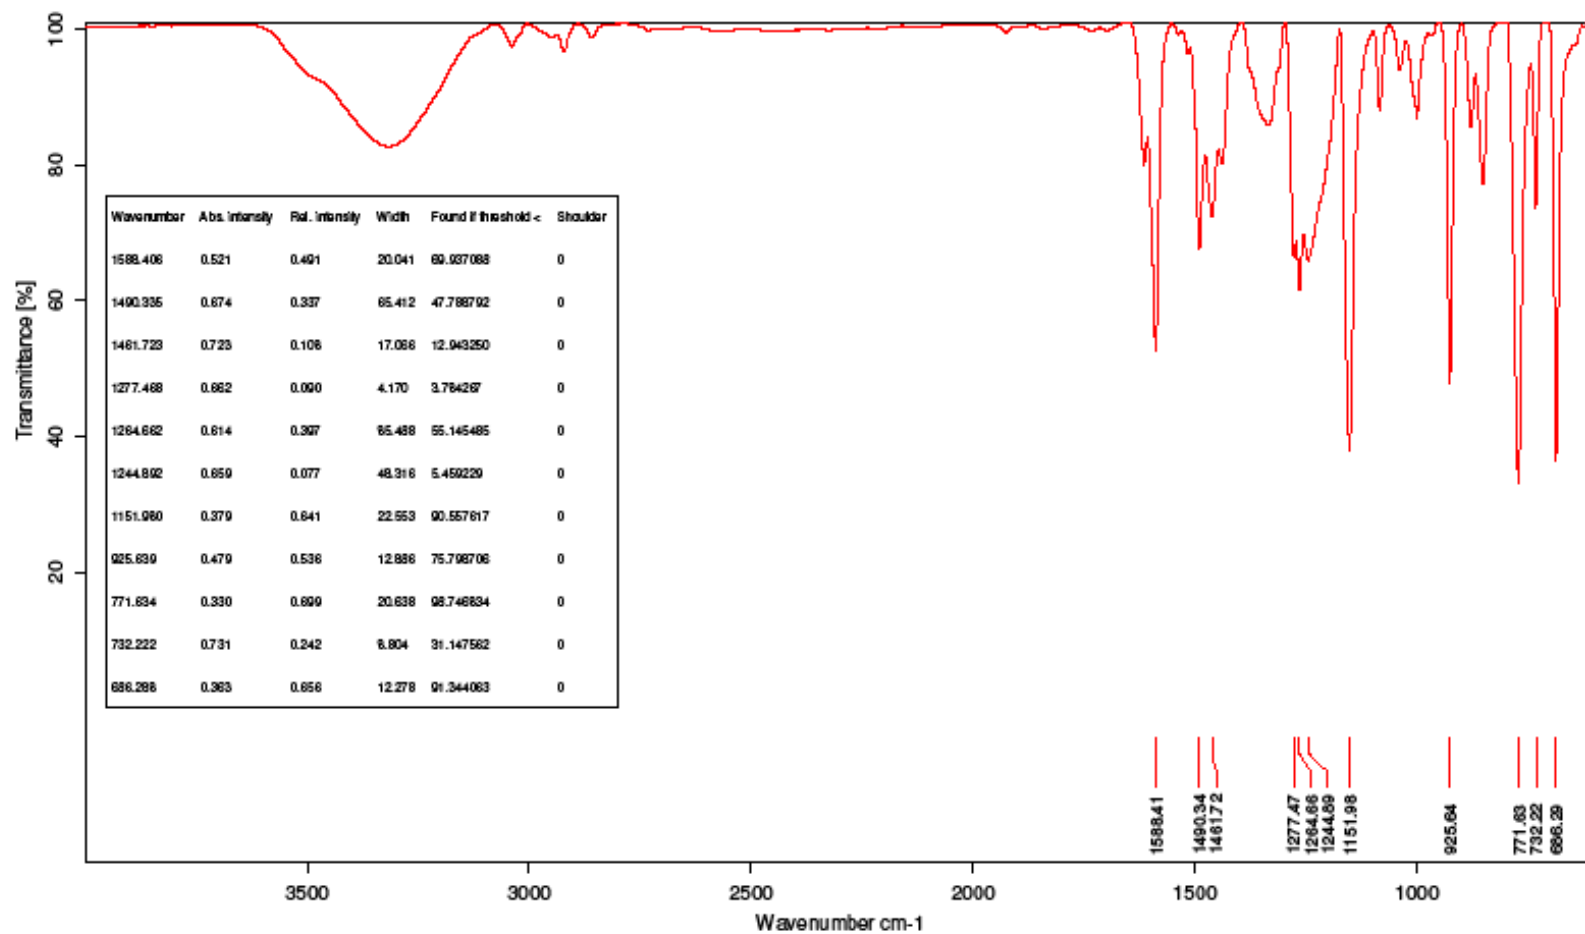

IR of *m*-cresol 1

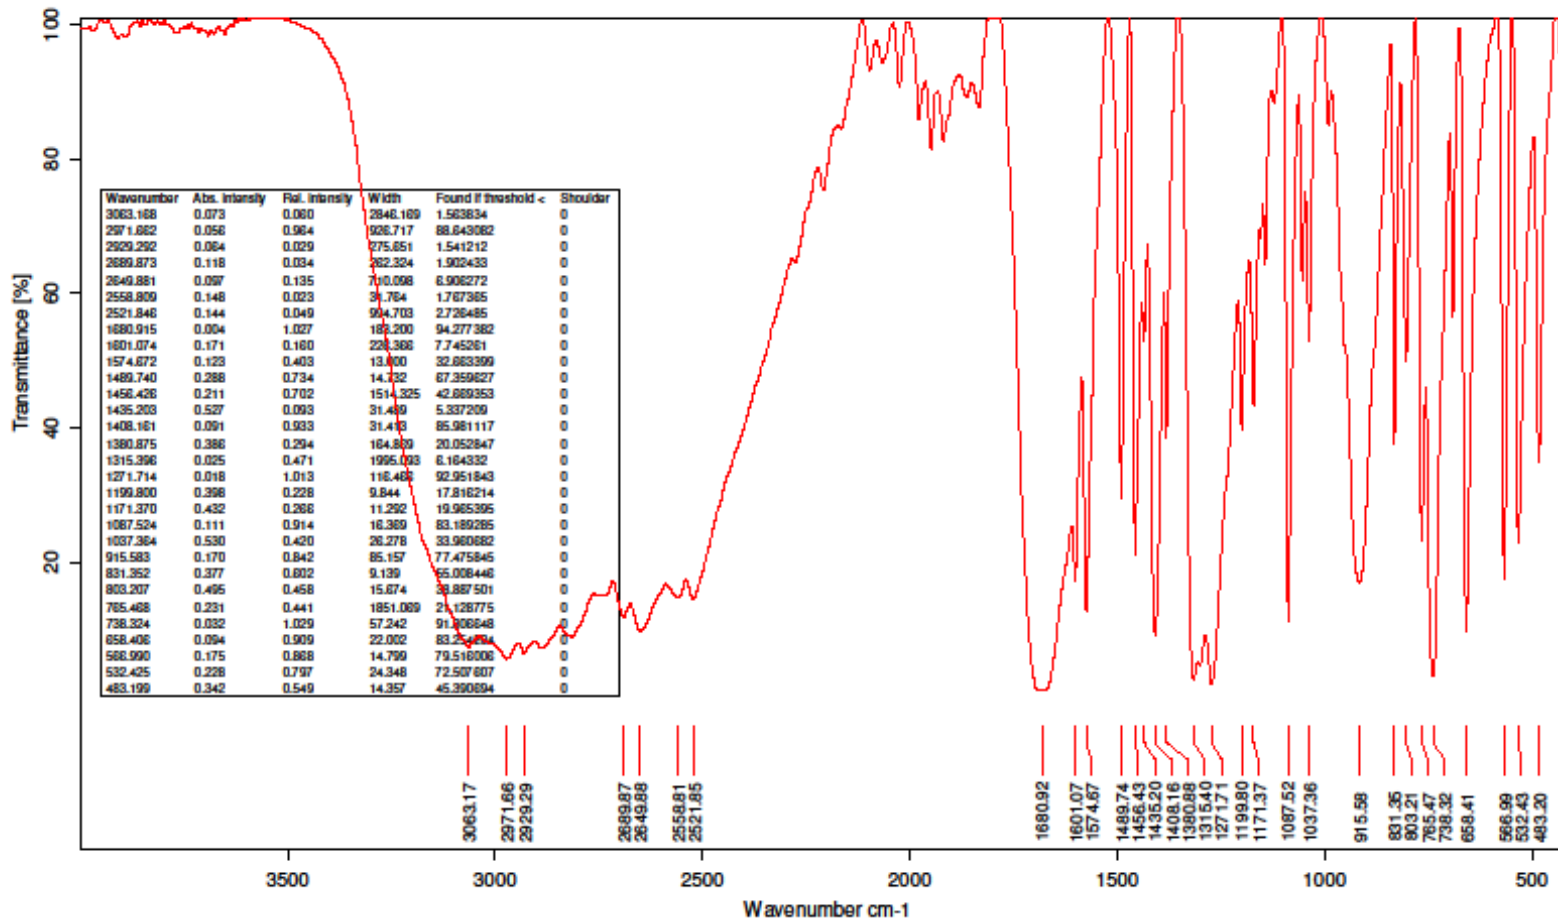

IR of *o*-toluic acid 2

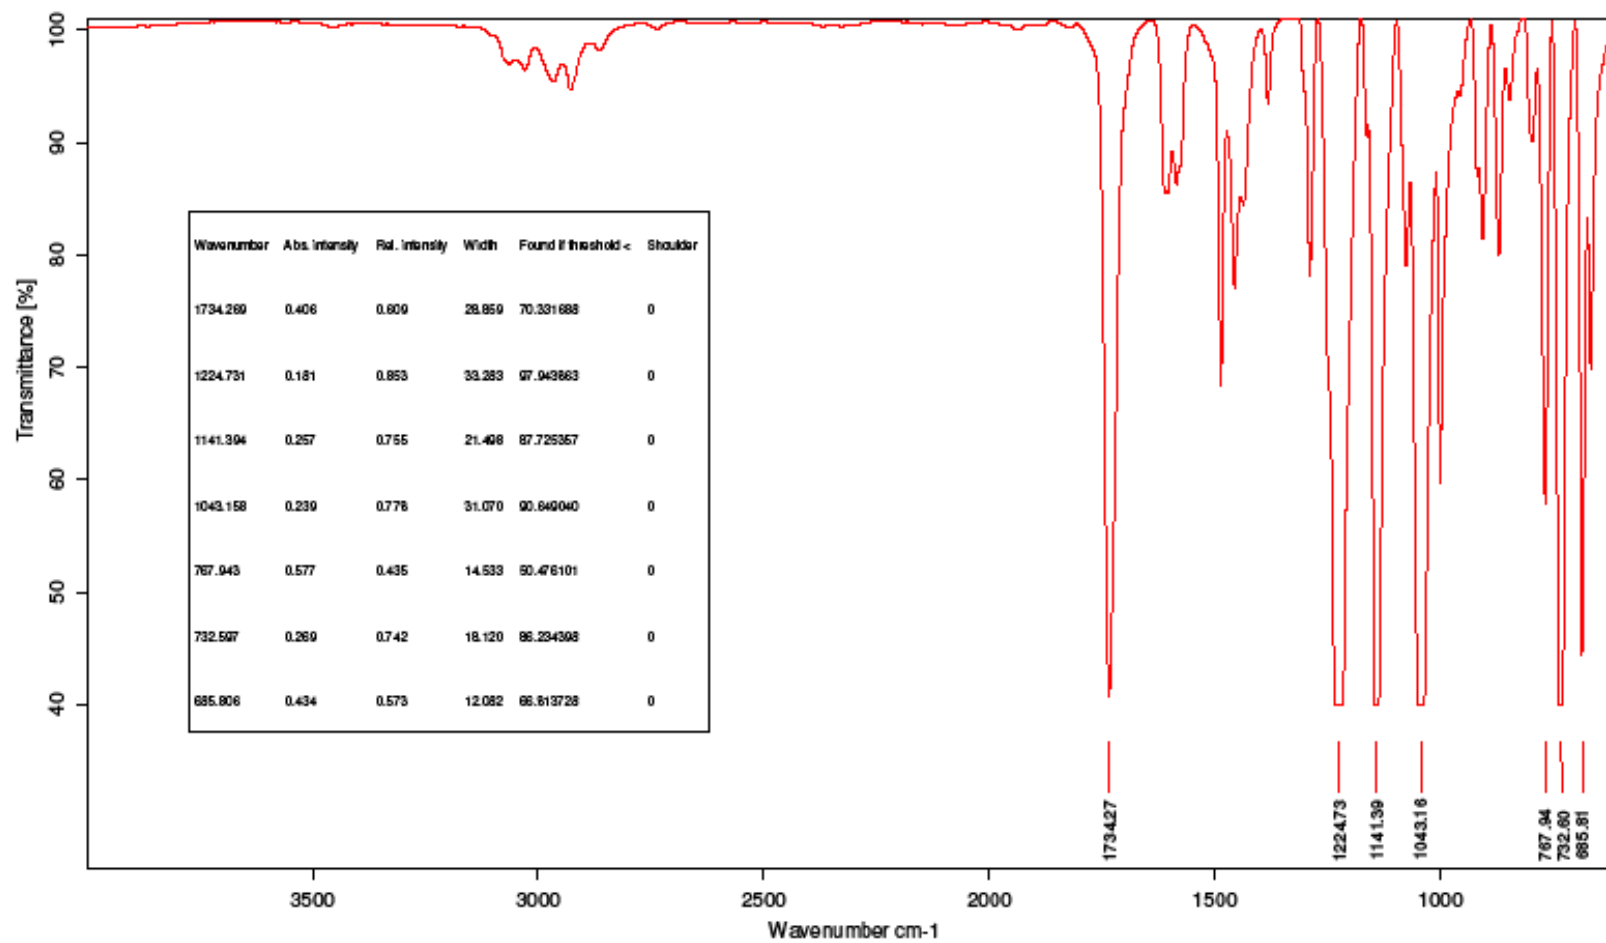

IR of 3-methylphenyl 2-methylbenzoate 4

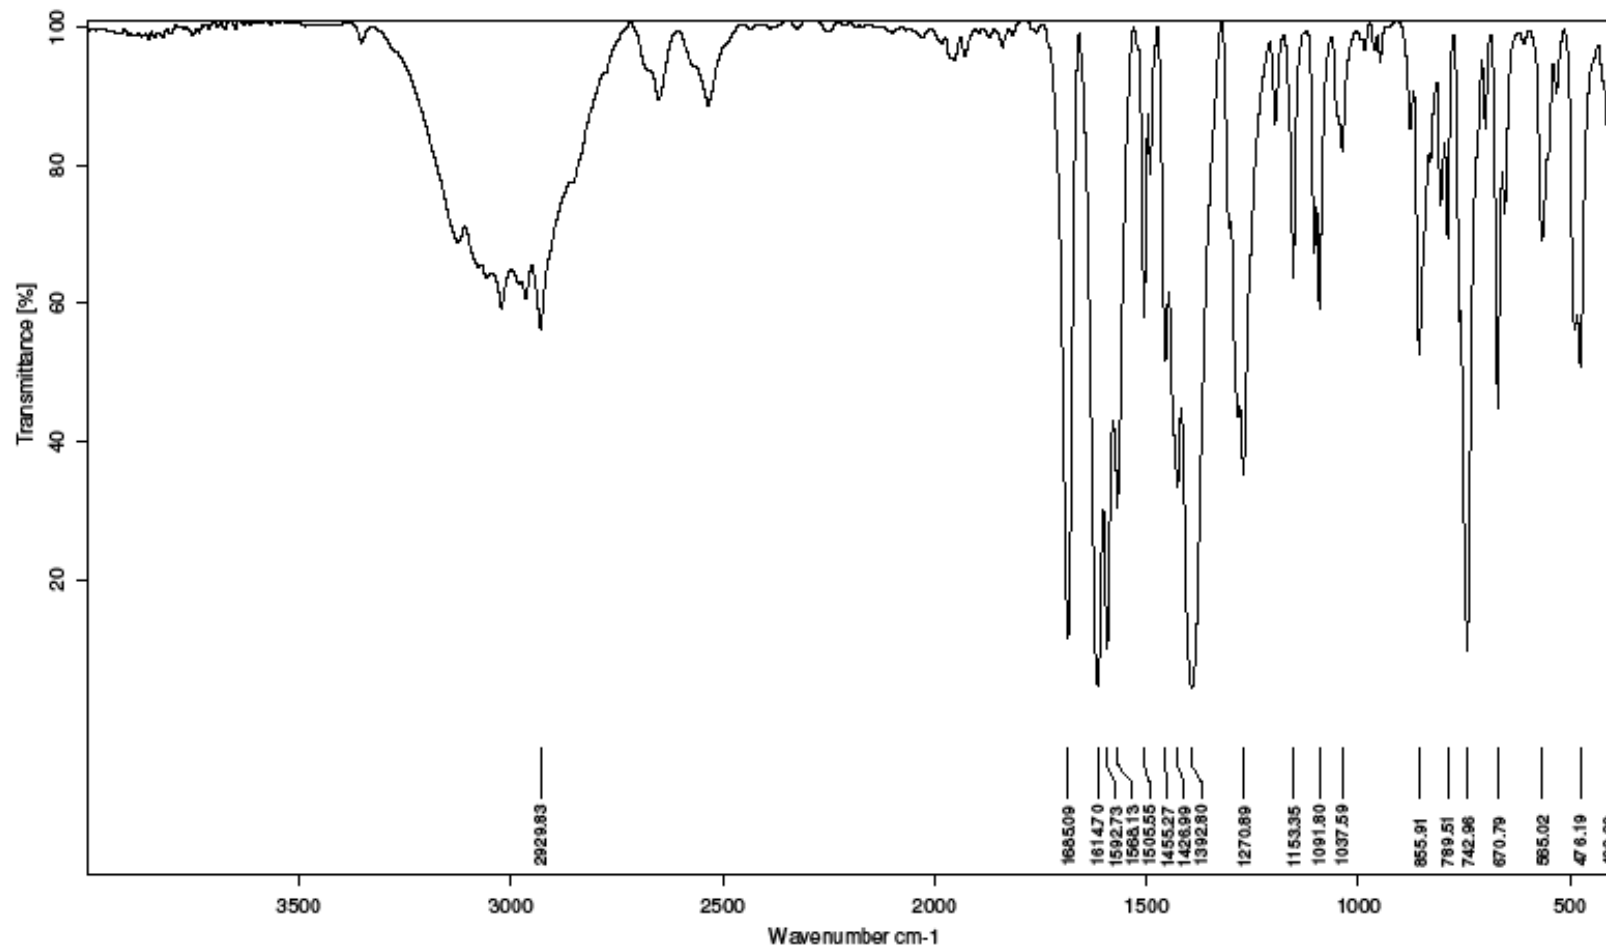

IR of tetrakis( $\mu_2$ -2-methylbenzoato)bis(2-methylbenzoic acid)copper(II) **5**

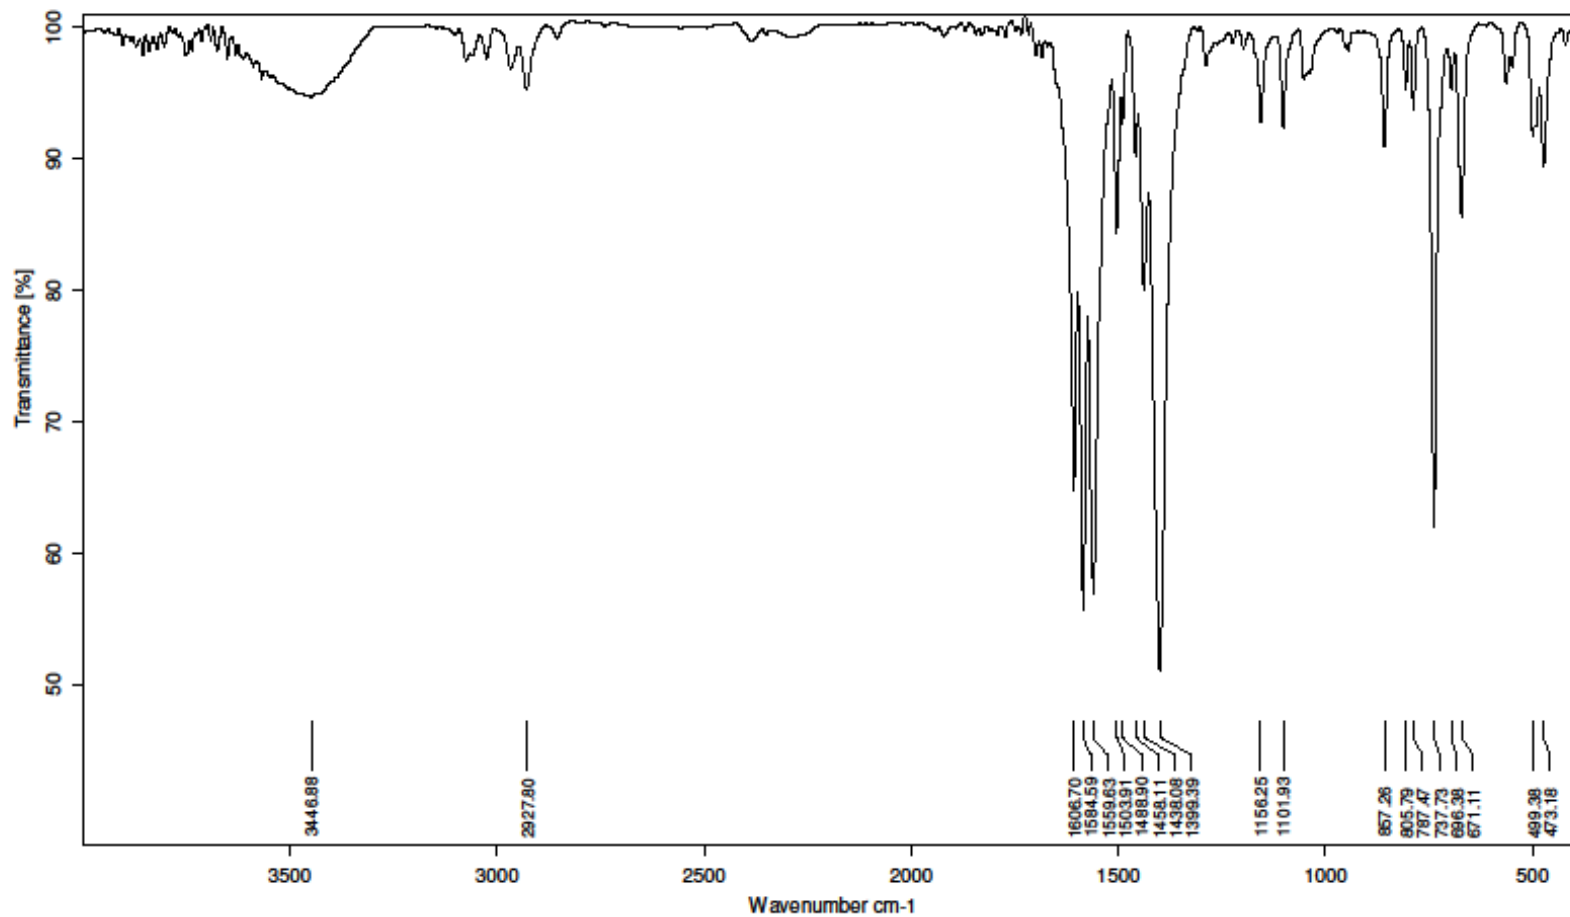

IR of tetrakis( $\mu_2$ -2-methylbenzoato) copper(II) **6**



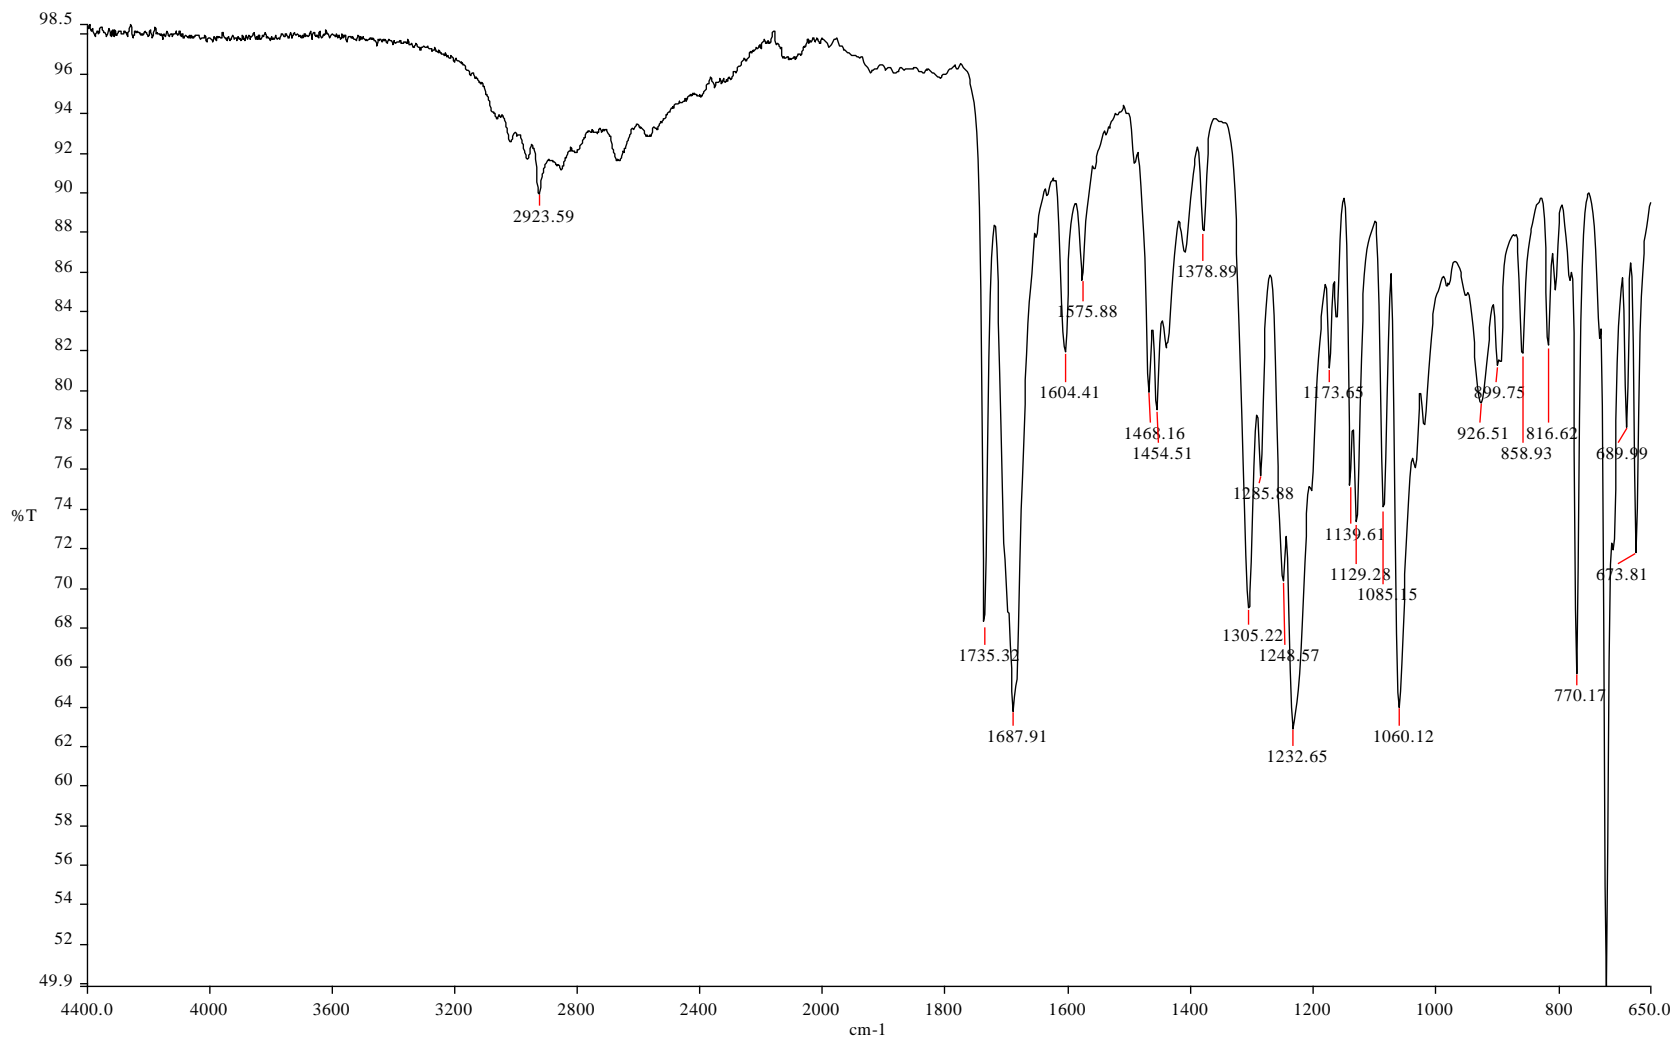

IR of 2-methyl-6-[(2-methylphenyl)carbonyl]oxybenzoic acid **3**

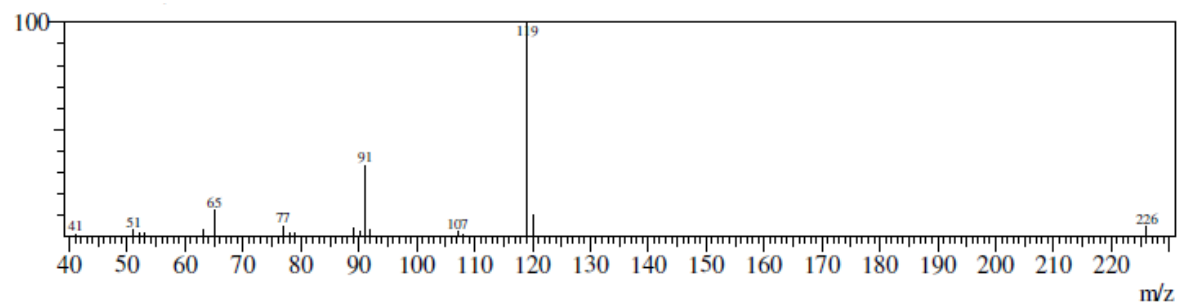

Mass spectrum of 3-methylphenyl 2-methylbenzoate **4**

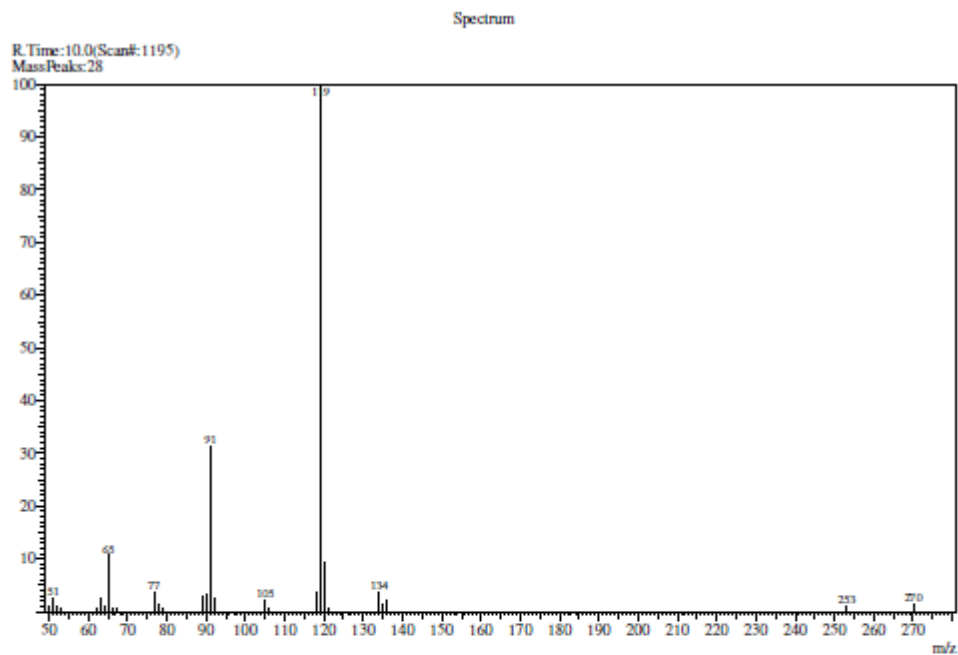

Mass Table  
R Time: 10.0 (Scan#: 1195)  
Mass Peaks: 28

| #  | m/z    | Abs. Int. | Rel. Int. |
|----|--------|-----------|-----------|
| 1  | 50.05  | 19698     | 0.85      |
| 2  | 51.05  | 59297     | 2.56      |
| 3  | 52.05  | 25939     | 1.12      |
| 4  | 53.05  | 17812     | 0.77      |
| 5  | 62.05  | 12501     | 0.54      |
| 6  | 63.00  | 52938     | 2.29      |
| 7  | 64.05  | 19457     | 0.84      |
| 8  | 65.05  | 246276    | 10.65     |
| 9  | 66.05  | 17056     | 0.74      |
| 10 | 67.05  | 9204      | 0.40      |
| 11 | 77.05  | 83975     | 3.63      |
| 12 | 78.05  | 35738     | 1.54      |
| 13 | 79.05  | 16865     | 0.73      |
| 14 | 89.05  | 69694     | 3.01      |
| 15 | 90.10  | 79047     | 3.42      |
| 16 | 91.10  | 724305    | 31.31     |
| 17 | 92.05  | 58992     | 2.55      |
| 18 | 105.05 | 46788     | 2.02      |
| 19 | 106.05 | 17230     | 0.74      |
| 20 | 118.15 | 84204     | 3.64      |
| 21 | 119.10 | 2313482   | 100.00    |
| 22 | 120.10 | 215420    | 9.31      |

Mass spectrum of 2-methyl-6-[[2-(2-methylphenyl)carbonyl]oxy]benzoic acid **3**

## Elemental Composition Report

Page 1

### Single Mass Analysis

Tolerance = 5.0 PPM / DBE: min = -1.5, max = 50.0

Element prediction: Off

Number of isotope peaks used for i-FIT = 3

Monoisotopic Mass, Even Electron Ions

17 formula(e) evaluated with 1 results within limits (all results (up to 1000) for each mass)

Elements Used:

C: 10-20 H: 10-20 O: 0-10 Na: 0-1

UPS

SCA 3,2-Benzoate 85 2 (0.017) Cm (2:59)

TOF MS ES+  
2.17e+005

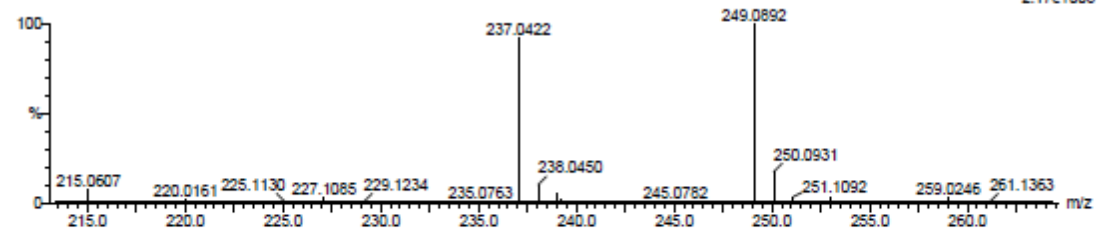

Minimum:

Maximum: 5.0 5.0 -1.5 50.0

| Mass     | Calc. Mass | mDa | PPM | DBE | i-FIT | i-FIT (Norm) | Formula       |
|----------|------------|-----|-----|-----|-------|--------------|---------------|
| 249.0892 | 249.0891   | 0.1 | 0.4 | 8.5 | 692.4 | 0.0          | C15 H14 O2 Na |

HR-MS of 3-methylphenyl 2-methylbenzoate **4**

## Elemental Composition Report

Page 1

### Single Mass Analysis

Tolerance = 5.0 PPM / DBE: min = -1.5, max = 50.0

Element prediction: Off

Number of isotope peaks used for i-FIT = 3

Monoisotopic Mass, Even Electron Ions

7 formula(e) evaluated with 1 results within limits (all results (up to 1000) for each mass)

Elements Used:

C: 15-20 H: 10-20 O: 0-5 Na: 0-1

Cherene Marais

CM-1-4 12 (0.188)

TOF MS ES+  
1.56e+003

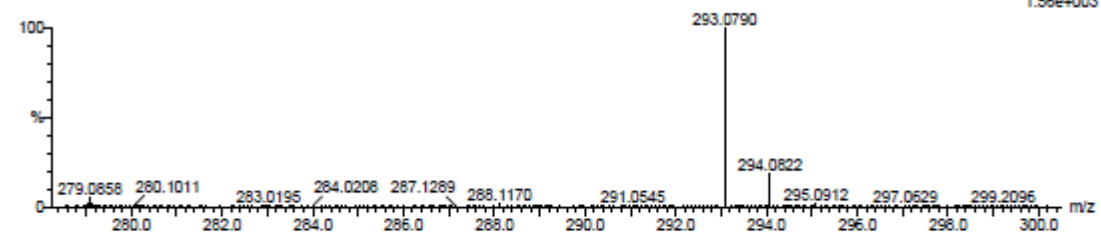

Minimum: -1.5  
Maximum: 5.0 5.0 50.0

| Mass     | Calc. Mass | mDa | PPM | DBE | i-FIT | i-FIT (Norm) | Formula       |
|----------|------------|-----|-----|-----|-------|--------------|---------------|
| 293.0790 | 293.0790   | 0.0 | 0.0 | 9.5 | 111.0 | 0.0          | C16 H14 O4 Na |

HR-MS of 2-methyl-6-[[2-methylphenyl]carbonyl]oxy}benzoic acid **3**

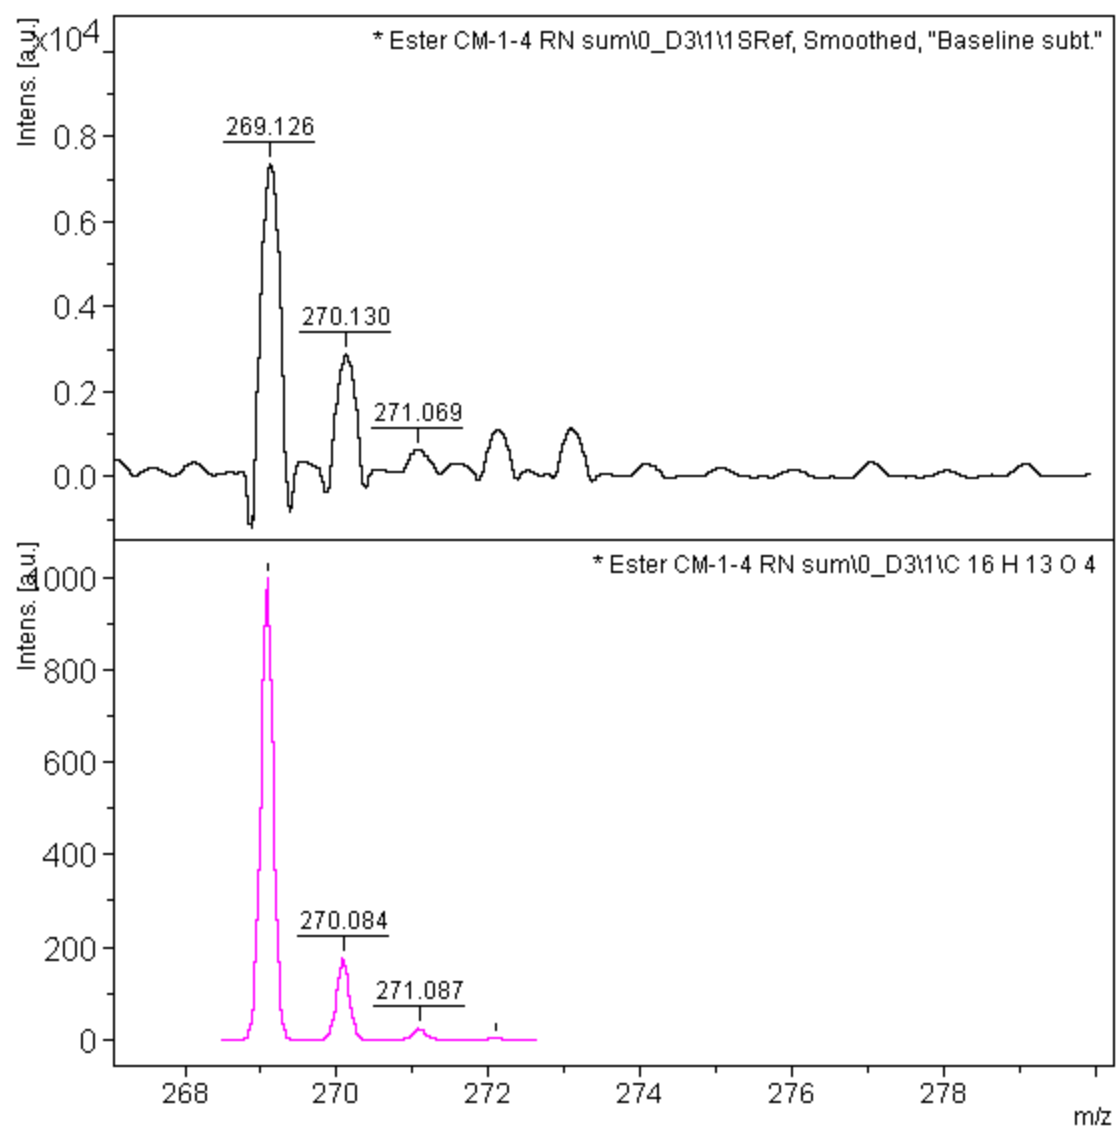

MALDI-TOF MS (-ve) of 2-methyl-6-((2-methylphenyl)carbonyloxy)benzoic acid **3**

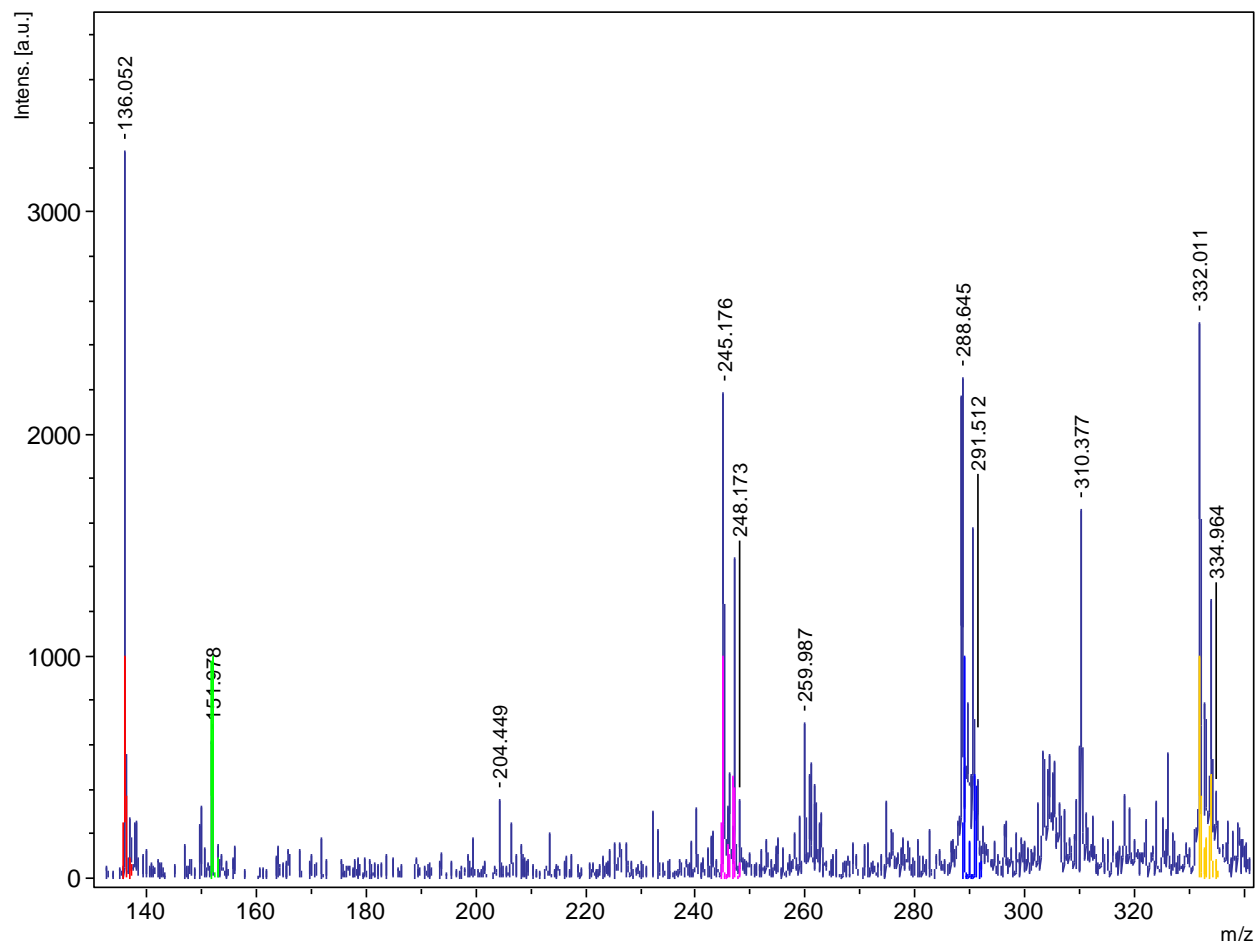

MALDI-TOF MS analysis (-ve) of the reaction mixture after the second DSC cycle on tetrakis( $\mu_2$ -2-methylbenzoato)bis(2-methylbenzoic acid)copper(II) **5**
